# Supplementary material for: The tungsten metallome of Pyrococcus furiosus
Source: Royal Society of Chemistry journal article supplement (doi:10.1039/b908175e), 2009-01-01
Supplement: b908175e.pdf [file b908175e.pdf]

## Electronic Supplementary Information

### The tungsten metallome of *Pyrococcus furiosus*

Ana-Maria Sevcenco,<sup>a,b</sup> Martijn W. H. Pinkse,<sup>a</sup> Emile Bol,<sup>a</sup> Gerard C. Krijger,<sup>b,c</sup> Hubert Th. Wolterbeek,<sup>b</sup> Peter D. E. M. Verhaert,<sup>a</sup> Peter-Leon Hagedoorn<sup>a</sup> and Wilfred R. Hagen<sup>\*a</sup>

<sup>a</sup>*Department of Biotechnology, Delft University of Technology, Julianalaan 67, 2628 BC Delft, The Netherlands.*

<sup>b</sup>*Department of Radiation, Radionuclides and Reactors, Delft University of Technology, Mekelweg 15, 2629 JB, Delft, The Netherlands*

<sup>c</sup>*Present address: RIKILT Institute of Food Safety, Bornsesteeg 45, 6708 PD Wageningen, The Netherlands.*

*\*To whom correspondance should be addressed.*

*E-mail: [w.r.hagen@tudelft.nl](mailto:w.r.hagen@tudelft.nl); Fax: +31 15 2782355 ; Tel: +31 15 2785051*

**Figure S1** Calibration curve of the phosphor screen for autoradiography. Volumes of 10  $\mu\text{l}$  of different dilutions of the  $^{187}\text{W}$  stock solution were applied to filter paper to which the phosphor screen was subsequently exposed for 2-h after 4 half-lives. Parallel samples of the dilution range were measured with a gamma counter. A linear relationship between the phosphor-screen intensity and radiation was seen over the whole concentration range.

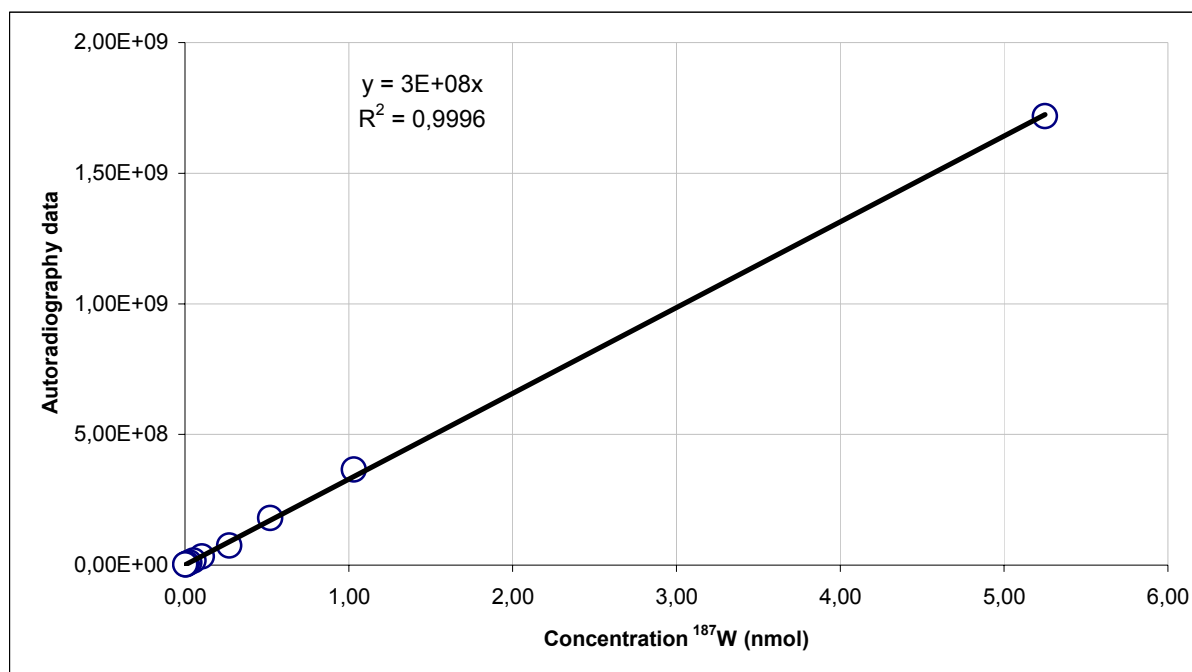

**Figure S2** Native–native 2D–PAGE of *P. furiosus* solubilised membrane proteins. **a**, Autoradiogram of native–native 2D–PAGE. **b**, Coomassie brilliant blue (CBB) stained gel of native–native 2D–PAGE. The extract was obtained from cells grown under normal growth conditions for 14 h at 95° C (135 µg protein) of *P. furiosus*.

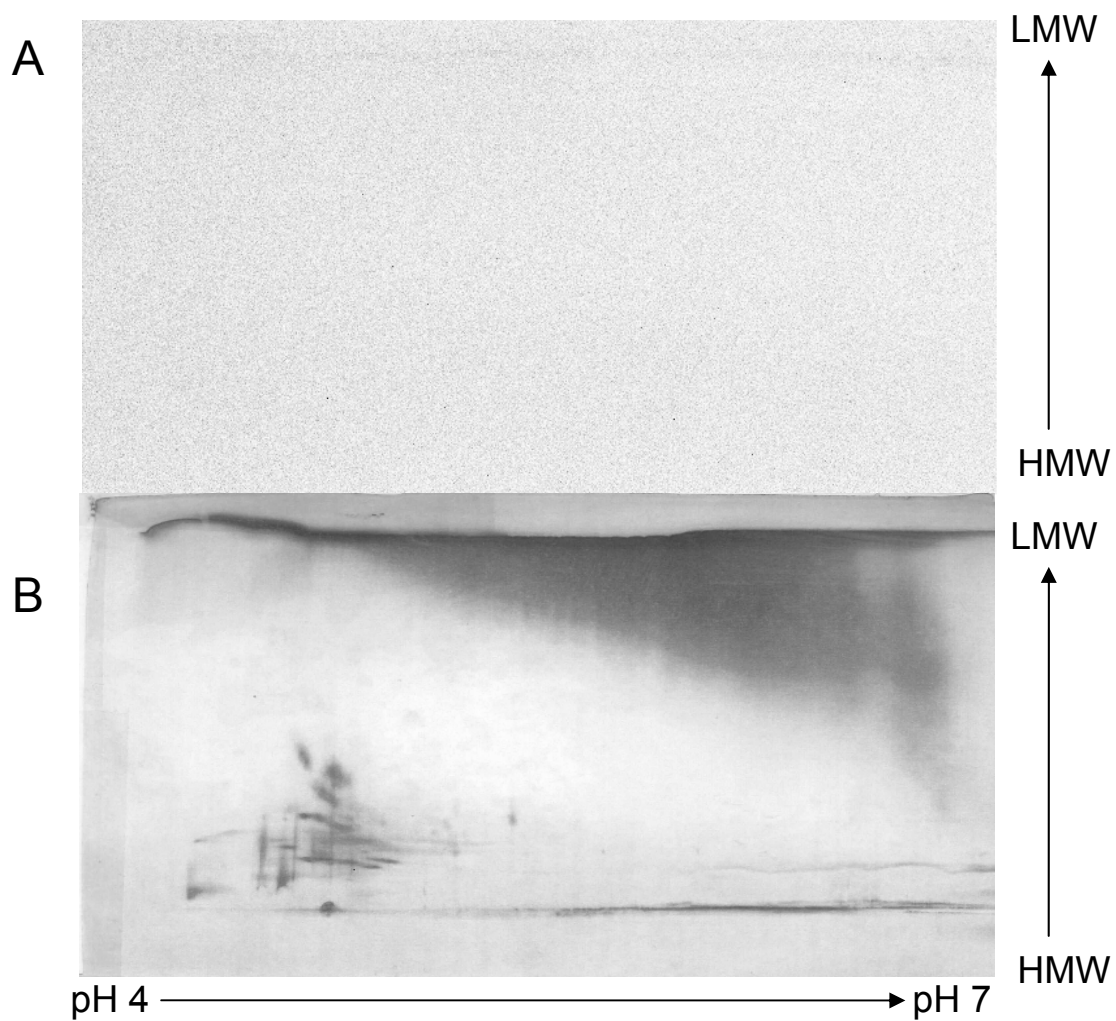

**Figure S3** Autoradiogram of native–native 2D–PAGE of  $^{187}\text{W}$  solution.

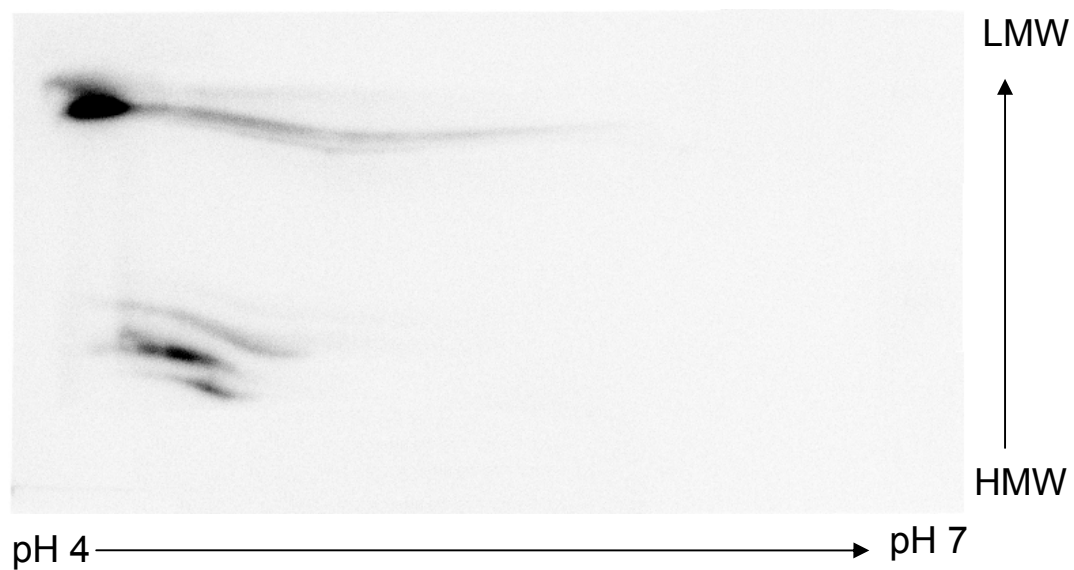

**Table S1** Protein identification using mass spectrometry from native–native 2D–PAGE separation of *P. furiosus* soluble protein extract, growth 14 h 95° C.

| Spot | Accession | Protein                                            | Mass    | # of unique peptides | Mascot Protein Score |
|------|-----------|----------------------------------------------------|---------|----------------------|----------------------|
| 1    | PF1203    | FOR                                                | 69,072  | 7                    | 269                  |
|      | PF0547    | Hypothetical protein                               | 50,895  | 6                    | 257                  |
| 2    | PF1540    | ADP forming acetyl coenzyme A synthetase           | 50,047  | 21                   | 1,160                |
|      | PF0861    | Phospho–sugar mutase                               | 49,715  | 17                   | 882                  |
|      | PF1838    | Hypothetical protein                               | 51,903  | 18                   | 850                  |
|      |           |                                                    | 65,025  | 19                   | 740                  |
|      | PF1480    | WOR5                                               |         |                      |                      |
|      | PF1787    | Acetyl–CoA synthetase                              | 25,862  | 14                   | 727                  |
|      | PF0966    | Pyruvate ferredoxin oxidoreductase alpha–2         | 44,216  | 11                   | 654                  |
|      | PF0588    | Cofactor–independent phosphoglycerate mutase       | 45,342  | 16                   | 615                  |
|      | PF1077    | Hypothetical protein                               | 49,458  | 9                    | 411                  |
|      | PF0421    | Hypothetical protein                               | 44,146  | 8                    | 376                  |
|      | PF1266    | Cystathionine gamma–synthase                       | 41,349  | 7                    | 358                  |
|      | PF1477    | Methylmalonyl–CoA mutase                           | 64,322  | 8                    | 337                  |
|      | PF0139    | Indolepyruvate ferredoxin oxidoreductase           | 20,009  | 6                    | 292                  |
|      | PF0965    | Ferredoxin oxidoreductase beta subunit             | 36,580  | 3                    | 289                  |
|      | PF1837    | Hypothetical protein                               | 26,427  | 7                    | 285                  |
|      | PF0265    | 8–amino–7–oxononanoate synthase                    | 43,840  | 4                    | 255                  |
|      | PF0207    | Argininosuccinate synthase                         | 46,058  | 4                    | 231                  |
|      | PF0966    | Pyruvate ferredoxin oxidoreductase subunit delta   | 12,460  | 4                    | 202                  |
|      | PF1946    | Methylmalonyl–CoA mutase, subunit alpha            | 15,641  | 3                    | 192                  |
|      | PF0890    | Leucyl–tRNA synthetase                             | 113,819 | 5                    | 186                  |
|      | PF0236    | Ribose–phosphate pyrophosphokinase                 | 30,928  | 4                    | 137                  |
|      | PF1076    | Hypothetical TLDD protein                          | 53,701  | 4                    | 133                  |
|      | PF1479    | Putative oxidoreductase, Fe–S subunit              | 19,796  | 3                    | 128                  |
|      | PF1328    | Hydrogenase gamma subunit                          | 30,968  | 2                    | 119                  |
|      | PF0935    | Acetolactate synthase                              | 62,064  | 3                    | 104                  |
|      | PF1232    | 4–aminobutyrate aminotransferase                   | 50,782  | 2                    | 100                  |
|      | PF1975    | Hypothetical protein                               | 54,281  | 2                    | 74                   |
|      | PF0372    | Molybdenum cofactor biosynthesis protein           | 18,562  | 2                    | 72                   |
|      | PF1283    | Rubrerythrin                                       | 19,716  | 2                    | 66                   |
|      | PF1327    | Glutamate synthase [NADPH] small chain             | 53,152  | 2                    | 56                   |
|      | PF0533    | Indolepyruvate ferredoxin oxidoreductase subunit a | 71,938  | 2                    | 56                   |
|      | 3         | PF0346                                             | AOR     | 66,931               | 9                    |
| 4    | PF0043    | Similar to <i>E. coli</i> pyruvate, water dikinase | 90,713  | 15                   | 797                  |

|    |        |                                                            |        |    |     |
|----|--------|------------------------------------------------------------|--------|----|-----|
|    | PF1974 | Thermosome, single subunit                                 | 60,001 | 14 | 623 |
|    | PF0346 | AOR                                                        | 66,931 | 12 | 605 |
|    | PF0402 | UDP- or dTTP-glucose 4-<br>epimerase or 4-6-dehydratase    | 35,396 | 11 | 570 |
|    | PF1394 | Phosphoglycerate dehydrogenase                             | 33,858 | 7  | 305 |
|    | PF1516 | GMP synthase subunit B                                     | 35,260 | 7  | 248 |
|    | PF1104 | Homoserine dehydrogenase                                   | 34,976 | 7  | 246 |
|    | PF1187 | Hypothetical protein                                       | 38,983 | 7  | 245 |
|    | PF0966 | Pyruvate ferredoxin oxidoreductase<br>alpha-2              | 44,216 | 5  | 197 |
|    | PF1787 | Acetyl-CoA synthetase                                      | 25,862 | 2  | 116 |
|    | PF1102 | Bifunctional short chain isoprenyl<br>diphosphate synthase | 38,337 | 2  | 104 |
|    | PF0077 | Biotin-protein ligase                                      | 25,691 | 3  | 98  |
|    | PF1602 | Chain A, Structure Of Glutamate<br>Dehydrogenase           | 46,953 | 3  | 95  |
|    | PF0308 | Adenylosuccinate synthetase                                | 37,226 | 2  | 80  |
|    | PF0421 | Hypothetical protein                                       | 44,146 | 2  | 71  |
|    | PF1729 | Phospho-sugar mutase                                       | 26,537 | 2  | 67  |
|    | PF1472 | Aspartate/serine transaminase                              | 42,956 | 2  | 67  |
|    | PF0751 | Flavoprotein                                               | 47,429 | 2  | 49  |
| 5  | PF1974 | Thermosome, single subunit                                 | 60,001 | 13 | 611 |
|    | PF0346 | AOR                                                        | 66,931 | 9  | 294 |
|    | PF0966 | Pyruvate ferredoxin oxidoreductase<br>alpha-2              | 44,216 | 3  | 135 |
|    | PF1516 | GMP synthase subunit B                                     | 35,260 | 3  | 96  |
| 6  | PF1961 | WOR4                                                       | 69,610 | 9  | 251 |
|    | PF1454 | Hypothetical protein                                       | 69,304 | 3  | 95  |
|    | PF1283 | Rubryerythrin                                              | 19,716 | 3  | 93  |
|    | PF0464 | GAPOR                                                      | 74,089 | 2  | 65  |
| 7  | PF1961 | WOR4                                                       | 69,610 | 2  | 76  |
| 8  | PF0464 | GAPOR                                                      | 74,089 | 2  | 60  |
|    | PF1961 | WOR4                                                       | 69,610 | 2  | 43  |
| 9  | PF0464 | GAPOR                                                      | 74,089 | 14 | 563 |
|    | PF0426 | Phosphoribosylaminoimidazole<br>carboxylase ATPase subunit | 41,130 | 5  | 224 |
|    | PF1203 | FOR                                                        | 69,072 | 5  | 199 |
|    | PF0794 | UDP-n-acetylglucosamine 2-<br>epimerase                    | 40,772 | 6  | 154 |
|    | PF1532 | NADH oxidase                                               | 48,155 | 2  | 106 |
|    | PF0422 | Phosphoribosylamine-glycine<br>ligase                      | 49,009 | 3  | 105 |
|    | PF1974 | Thermosome, single subunit                                 | 60,001 | 3  | 84  |
|    | PF1920 | Triosephosphate isomerase                                  | 24,165 | 2  | 74  |
|    | PF0265 | 2-amino-3-ketobutyrate coenzyme<br>A ligase                | 43,840 | 2  | 73  |
|    | PF0935 | Acetolactate synthase                                      | 62,064 | 2  | 56  |
|    | PF1232 | 4-aminobutyrate aminotransferase                           | 50,782 | 2  | 52  |
| 10 | PF1535 | Alpha-glucan phosphorylase                                 | 97,815 | 17 | 680 |
|    | PF1602 | Glutamate dehydrogenase                                    | 47,141 | 13 | 663 |
|    | PF0043 | Similar to <i>E. coli</i> pyruvate, water<br>dikinase      | 90,713 | 12 | 563 |
|    | PF0966 | Pyruvate ferredoxin oxidoreductase                         | 44,216 | 11 | 522 |

---

| alpha-2 |                                                        |        |    |     |
|---------|--------------------------------------------------------|--------|----|-----|
| PF1529  | Pyridoxine biosynthesis protein                        | 36,933 | 13 | 460 |
| PF0766  | Putative dehydrogenase                                 | 35,467 | 7  | 355 |
| PF0965  | Ferredoxin oxidoreductase beta subunit                 | 36,580 | 6  | 343 |
| PF1592  | Tryptophan synthase subunit beta                       | 49,642 | 7  | 328 |
| PF1974  | Thermosome, single subunit                             | 60,001 | 6  | 263 |
| PF0613  | Hypothetical protein                                   | 41,801 | 5  | 239 |
| PF1627  | Glycyl-tRNA synthetase                                 | 66,698 | 5  | 213 |
| PF1375  | Elongation factor Tu                                   | 47,605 | 5  | 199 |
| PF0102  | Hypothetical protein                                   | 28,088 | 4  | 171 |
| PF1975  | Hypothetical protein                                   | 54,281 | 4  | 128 |
| PF1030  | Methionyl-tRNA synthetase                              | 85,393 | 3  | 115 |
| PF1351  | Threonyl-tRNA synthetase                               | 73,333 | 3  | 111 |
| PF0969  | 2-ketovalerate ferredoxin oxidoreductase subunit alpha | 43,989 | 2  | 95  |
| PF0248  | Hypothetical protein                                   | 17,705 | 2  | 94  |
| PF0139  | Indolepyruvate ferredoxin oxidoreductase               | 20,009 | 3  | 82  |
| PF0321  | Related to inosine monophosphate dehydrogenase         | 44,230 | 2  | 76  |
| PF1778  | Serine hydroxymethyltransferase                        | 48,013 | 2  | 72  |
| PF0430  | 5'-phosphoribosylglycinamide transformylase            | 48,315 | 2  | 64  |

---

The position of the spot number is indicated in Fig. 3A.

This table contains just proteins with a number of unique peptides  $\geq 2$ .

**Table S2** Protein identification with mass spectrometry after native–native 2D–PAGE separation of *P. furiosus* soluble protein extract obtained from cold–shock growth conditions 5 hours at 72° C in addition to 14 h 95° C.

| Spot   | Accession | Protein                                      | Mass                                     | # of unique peptides | Mascot Protein Score |       |
|--------|-----------|----------------------------------------------|------------------------------------------|----------------------|----------------------|-------|
| 1      | PF1203    | FOR                                          | 69,072                                   | 17                   | 791                  |       |
|        | PF1422    | Thioredoxin reductase                        | 38,354                                   | 4                    | 215                  |       |
|        | PF0547    | Hypothetical protein                         | 50,895                                   | 3                    | 157                  |       |
| 2      | PF1540    | ADP forming acetyl coenzyme A synthetase     | 50,047                                   | 23                   | 1,577                |       |
|        | PF1480    | WOR5                                         | 65,025                                   | 25                   | 1,330                |       |
|        | PF1787    | Acetyl–CoA synthetase                        | 25,862                                   | 16                   | 1,033                |       |
|        | PF0421    | Hypothetical protein                         | 44,146                                   | 14                   | 633                  |       |
|        | PF0861    | Phospho–sugar mutase                         | 49,715                                   | 11                   | 145                  |       |
|        | PF1838    | Hypothetical protein                         | 51,903                                   | 9                    | 416                  |       |
|        | PF1479    | Putative oxidoreductase, Fe–S subunit        | 19,796                                   | 5                    | 261                  |       |
|        | PF0965    | Ferredoxin oxidoreductase beta subunit       | 36,580                                   | 5                    | 222                  |       |
|        | PF1771    | 2–oxoglutarate ferredoxin oxidoreductase     | 44,206                                   | 5                    | 221                  |       |
|        | PF0139    | Indolepyruvate ferredoxin oxidoreductase     | 20,009                                   | 3                    | 221                  |       |
|        | PF1477    | Methylmalonyl–CoA mutase                     | 64,322                                   | 6                    | 202                  |       |
|        | PF1208    | Beta–mannosidase                             | 59,089                                   | 6                    | 201                  |       |
|        | PF0547    | Hypothetical protein                         | 50,895                                   | 3                    | 177                  |       |
|        | PF0588    | Cofactor–independent phosphoglycerate mutase | 45,342                                   | 5                    | 167                  |       |
|        | PF0016    | 5′–methylthioadenosine phosphorylase         | 29,486                                   | 3                    | 124                  |       |
|        | PF1853    | 3–ketoacyl–(acyl–carrier–protein) reductase  | 28,520                                   | 3                    | 123                  |       |
|        | PF1837    | Hypothetical protein                         | 26,427                                   | 3                    | 95                   |       |
|        | PF1203    | FOR                                          | 69,072                                   | 3                    | 90                   |       |
|        | PF1076    | Hypothetical TLDD protein                    | 53,701                                   | 2                    | 83                   |       |
|        | 3         | PF0346                                       | AOR                                      | 66,931               | 33                   | 2,184 |
|        |           | PF1241                                       | Uracil phosphoribosyltransferase         | 26,147               | 17                   | 795   |
|        |           | PF0318                                       | Hypothetical acylaminoacyl–peptidase     | 72,991               | 18                   | 682   |
|        |           | PF1540                                       | ADP forming acetyl coenzyme A synthetase | 50,047               | 8                    | 475   |
| PF1535 |           | Alpha–glucan phosphorylase                   | 97,815                                   | 11                   | 451                  |       |
| PF1920 |           | Triosephosphate isomerase                    | 24,165                                   | 8                    | 443                  |       |
| PF0751 |           | Flavoprotein                                 | 47,429                                   | 10                   | 381                  |       |
| PF0175 |           | Trk system potassium uptake – like protein   | 25,496                                   | 7                    | 347                  |       |
| PF1787 |           | Acetyl–CoA synthetase                        | 25,862                                   | 3                    | 268                  |       |
| PF0272 |           | Alpha–amylase                                | 76,375                                   | 7                    | 246                  |       |
| PF1480 |           | WOR5                                         | 65,025                                   | 3                    | 207                  |       |
| PF1778 |           | Serine hydroxymethyltransferase              | 48,013                                   | 5                    | 165                  |       |
| PF0183 |           | V–type ATP synthase subunit B                | 51,940                                   | 3                    | 161                  |       |
| PF0182 |           | V–type ATP synthase subunit A                | 113,609                                  | 2                    | 134                  |       |
| PF1532 |           | NADH oxidase                                 | 48,155                                   | 2                    | 91                   |       |

|   |        |                                                          |         |    |       |
|---|--------|----------------------------------------------------------|---------|----|-------|
|   | PF0966 | Pyruvate ferredoxin oxidoreductase alpha-2               | 44,216  | 2  | 78    |
| 4 | PF0402 | UDP- or dTTP-glucose 4-epimerase or 4-6-dehydratase      | 35,396  | 13 | 613   |
|   | PF0346 | AOR                                                      | 66,931  | 10 | 476   |
|   | PF0077 | Biotin-protein ligase                                    | 25,691  | 6  | 375   |
|   | PF0980 | Putative aspartate racemase                              | 25,268  | 8  | 362   |
|   | PF1187 | Hypothetical protein                                     | 38,983  | 5  | 352   |
|   | PF1516 | GMP synthase subunit B                                   | 35,260  | 6  | 233   |
|   | PF1893 | Transcriptional regulatory protein, asnC family          | 8,582   | 3  | 149   |
|   | PF1289 | Putative thiamine biosynthesis protein                   | 21,937  | 4  | 137   |
|   | PF0722 | Alkyl hydroperoxide reductase subunit c                  | 21,603  | 3  | 116   |
|   | PF1343 | Xaa-pro dipeptidase (proline dipeptidase)                | 39,420  | 2  | 111   |
|   | PF0598 | Aspartate carbamoyltransferase regulatory subunit        | 17,107  | 2  | 91    |
|   | PF1394 | Phosphoglycerate dehydrogenase                           | 33,858  | 2  | 78    |
| 5 | PF1974 | Thermosome, single subunit                               | 60,001  | 18 | 1,043 |
|   | PF1787 | Acetyl-CoA synthetase                                    | 25,862  | 15 | 838   |
|   | PF0966 | Pyruvate ferredoxin oxidoreductase alpha-2               | 44,216  | 11 | 667   |
|   | PF0346 | AOR                                                      | 66,931  | 9  | 405   |
|   | PF0432 | Putative sugar-catabolism phosphotransferase             | 30,598  | 5  | 133   |
|   | PF0940 | 3-isopropylmalate dehydrogenase 2                        | 39,387  | 3  | 86    |
|   | PF1281 | Superoxide reductase                                     | 14,372  | 3  | 86    |
|   | PF1102 | Bifunctional short chain isoprenyl diphosphate synthase  | 38,337  | 2  | 83    |
|   | PF0009 | Hypothetical protein                                     | 25,590  | 2  | 78    |
|   | PF1105 | Pyrazinamidase/nicotinamidase pxnc                       | 20,038  | 2  | 65    |
| 6 | PF1961 | WOR4                                                     | 69,610  | 27 | 2,332 |
|   | PF0464 | GAPOR                                                    | 74,089  | 14 | 792   |
|   | PF0422 | Phosphoribosylamine-glycine ligase                       | 49,009  | 12 | 624   |
|   | PF1203 | FOR                                                      | 69,072  | 15 | 498   |
|   | PF1532 | NADH oxidase                                             | 48,155  | 6  | 338   |
|   | PF0980 | Putative aspartate racemase                              | 25,268  | 6  | 298   |
|   | PF1454 | Hypothetical protein                                     | 69,304  | 8  | 266   |
|   | PF1283 | Rubrerythrin                                             | 19,716  | 7  | 234   |
|   | PF0097 | 43 kDa subunit bacteriochlorophyll synthase-like protein | 44,110  | 5  | 204   |
|   | PF0440 | Ribonucleotide-diphosphate reductase alpha subunit       | 201,603 | 5  | 185   |
|   | PF0931 | Nucleoside diphosphate kinase                            | 18,494  | 4  | 159   |
|   | PF1355 | NDP-sugar dehydrogenase                                  | 48,186  | 4  | 157   |
|   | PF0098 | NAD(+) synthetase                                        | 28,874  | 4  | 144   |
|   | PF0265 | 8-amino-7-oxononanoate synthase                          | 43,840  | 3  | 137   |

|    |        |                                                          |         |    |       |
|----|--------|----------------------------------------------------------|---------|----|-------|
|    | PF0016 | 5'-methylthioadenosine phosphorylase                     | 29,531  | 3  | 116   |
|    | PF1560 | Transcription elongation factor NusA                     | 18,377  | 3  | 111   |
|    | PF1299 | Pyrrolidone Carboxyl Peptidase                           | 22,775  | 2  | 93    |
| 7  | PF1961 | WOR4                                                     | 69,610  | 28 | 1,803 |
|    | PF0422 | Phosphoribosylamine—glycine ligase                       | 49,009  | 14 | 692   |
|    | PF0464 | GAPOR                                                    | 74,089  | 10 | 424   |
|    | PF1532 | NADH oxidase                                             | 48,155  | 8  | 333   |
|    | PF1488 | Hypothetical protein                                     | 26,520  | 4  | 185   |
|    |        | Putative aspartate aminotransferase                      | 47,198  | 3  | 141   |
|    | PF1283 | Rubrerythrin                                             | 19,716  | 4  | 125   |
|    | PF1454 | Hypothetical protein                                     | 69,304  | 4  | 120   |
|    | PF0016 | 5'-methylthioadenosine phosphorylase                     | 29531   | 3  | 107   |
|    | PF1137 | Translation initiation factor IF-2                       | 110,933 | 3  | 102   |
|    | PF0097 | 43 kDa subunit bacteriochlorophyll synthase-like protein | 44,110  | 2  | 94    |
|    | PF1355 | NDP-sugar dehydrogenase                                  | 48,186  | 2  | 85    |
|    | PF0265 | 8-amino-7-oxononanoate synthase                          | 43,840  | 2  | 77    |
|    | PF1327 | Glutamate synthase [NADPH] small chain                   | 53,152  | 2  | 75    |
|    | PF0595 | Diphthine synthase                                       | 30,255  | 2  | 66    |
| 8  | PF1961 | WOR4                                                     | 69,610  | 32 | 1,616 |
|    | PF1355 | NDP-sugar dehydrogenase                                  | 48,186  | 10 | 404   |
|    | PF1137 | Translation initiation factor IF-2                       | 110,933 | 9  | 361   |
|    | PF1532 | NADH oxidase                                             | 48,155  | 7  | 298   |
|    | PF1987 | Hypothetical protein                                     | 69,072  | 5  | 176   |
|    | PF1327 | Glutamate synthase [NADPH] small chain                   | 53,152  | 3  | 100   |
|    | PF1283 | Rubrerythrin                                             | 19,716  | 3  | 97    |
|    | PF0016 | 5'-methylthioadenosine phosphorylase                     | 29,531  | 2  | 91    |
|    | PF0422 | Phosphoribosylamine—glycine ligase                       | 49,009  | 2  | 65    |
| 9  | PF0464 | GAPOR                                                    | 74,089  | 12 | 530   |
|    | PF1961 | WOR4                                                     | 69,610  | 3  | 207   |
|    | PF1246 | Sarcosine oxidase, subunit beta                          | 42,533  | 4  | 153   |
|    | PF1016 | 2-hydroxyhepta-2,4-diene-1,7-dioate isomerase            | 25,248  | 2  | 112   |
|    | PF0747 | Putative proline dipeptidase                             | 40,871  | 3  | 78    |
|    | PF0422 | Phosphoribosylamine—glycine ligase                       | 49,009  | 2  | 64    |
|    | PF2038 | Cob(I)yrinic acid a,c-diamide adenosyltransferase        | 19,728  | 2  | 60    |
| 10 | PF0139 | Indolepyruvate ferredoxin oxidoreductase                 | 20,009  | 3  | 243   |
|    | PF0042 | Metal-dependent hydrolase                                | 24,554  | 2  | 135   |
|    | PF0861 | Phospho-sugar mutase                                     | 49,715  | 2  | 91    |
|    | PF0464 | GAPOR                                                    | 74,089  | 2  | 83    |

|        |        |                                                       |                                                       |        |       |     |
|--------|--------|-------------------------------------------------------|-------------------------------------------------------|--------|-------|-----|
| 11     | PF1394 | Phosphoglycerate dehydrogenase                        | 33,858                                                | 11     | 521   |     |
|        | PF0464 | GAPOR                                                 | 74,089                                                | 15     | 479   |     |
|        | PF1126 | Hypothetical protein                                  | 32,609                                                | 8      | 330   |     |
|        | PF2038 | Cob(I)yrinic acid a,c-diamide<br>adenosyltransferase  | 19,728                                                | 5      | 195   |     |
|        | PF0042 | Metal-dependent hydrolase                             | 24,554                                                | 4      | 172   |     |
|        | PF0139 | Indolepyruvate ferredoxin<br>oxidoreductase           | 20,009                                                | 3      | 129   |     |
| 12     | PF0861 | Phospho-sugar mutase                                  | 49,715                                                | 23     | 1,164 |     |
|        | PF1540 | ADP forming acetyl coenzyme A<br>synthetase           | 50,047                                                | 18     | 1,097 |     |
|        | PF1480 | WOR5                                                  | 65,025                                                | 15     | 637   |     |
|        | PF1477 | Methylmalonyl-CoA mutase                              | 64,322                                                | 17     | 630   |     |
|        | PF0588 | Cofactor-independent<br>phosphoglycerate mutase       | 45342                                                 | 10     | 558   |     |
|        | PF1787 | Acetyl-CoA synthetase                                 | 25,862                                                | 8      | 482   |     |
|        | PF1771 | 2-oxoglutarate ferredoxin<br>oxidoreductase           | 44,206                                                | 9      | 440   |     |
|        | PF0533 | Indolepyruvate ferredoxin<br>oxidoreductase subunit a | 71,938                                                | 8      | 355   |     |
|        | PF0965 | Ferredoxin oxidoreductase beta<br>subunit             | 36,580                                                | 6      | 334   |     |
|        | PF1946 | Methylmalonyl-CoA mutase,<br>subunit alpha            | 15,641                                                | 5      | 287   |     |
|        | PF1837 | Hypothetical protein                                  | 26,427                                                | 6      | 242   |     |
|        | PF0935 | Acetolactate synthase                                 | 62,064                                                | 5      | 237   |     |
|        | PF0139 | Indolepyruvate ferredoxin<br>oxidoreductase           | 20,009                                                | 5      | 236   |     |
|        | PF1838 | Hypothetical protein                                  | 51,903                                                | 5      | 221   |     |
|        | PF1076 | Hypothetical TLDD protein                             | 53,701                                                | 3      | 194   |     |
|        | PF1077 | Hypothetical protein                                  | 49,458                                                | 3      | 169   |     |
|        | PF0547 | Hypothetical protein                                  | 50,895                                                | 5      | 167   |     |
|        | PF0534 | Indolepyruvate ferredoxin<br>oxidoreductase           | 23,673                                                | 4      | 139   |     |
|        | PF0075 | Alcohol dehydrogenase                                 | 42,938                                                | 3      | 124   |     |
|        | PF0308 | Adenylosuccinate lyase                                | 51,724                                                | 2      | 113   |     |
|        | PF1479 | Putative oxidoreductase, Fe-S<br>subunit              | 19,796                                                | 2      | 60    |     |
|        | 13     | PF1375                                                | Elongation factor Tu                                  | 47,605 | 7     | 225 |
|        |        | PF1535                                                | Alpha-glucan phosphorylase                            | 97,815 | 5     | 210 |
| PF1547 |        | Endoglucanase                                         | 38,616                                                | 3      | 94    |     |
| PF1861 |        | Endo-1,4-beta-glucanase-like<br>protein               | 38,247                                                | 3      | 81    |     |
| PF2012 |        | Elongation factor EF-2                                | 82,374                                                | 2      | 76    |     |
| PF0594 |        | Ornithine carbamoyltransferase                        | 35,273                                                | 2      | 63    |     |
| 14     |        | PF0043                                                | Similar to <i>E. coli</i> pyruvate, water<br>dikinase | 90,713 | 4     | 150 |
|        | PF1375 | Elongation factor Tu                                  | 47,605                                                | 3      | 111   |     |
|        | PF0966 | Pyruvate ferredoxin<br>oxidoreductase alpha-2         | 44,216                                                | 2      | 106   |     |
|        | PF1266 | Cystathionine gamma-synthase                          | 41,349                                                | 2      | 85    |     |

The position of the spot number is indicated in Fig. 3B.

This table contains just proteins with a number of unique peptides  $\geq 2$ .
